# Supplementary material
Source: ML conference proceedings conference paper supplement (https://openaccess.thecvf.com/content/CVPR2026/html/Zheng_Outlier-Robust_Diffusion_Solvers_CVPR_2026_paper.html)
Supplement: Supplementary file 1 [file Zheng_Outlier-Robust_Diffusion_Solvers_CVPR_2026_supplemental.pdf]

# Outlier-Robust Diffusion Solvers for Inverse Problems

## Supplementary Material

### A. Comparison with IRLS-PnPDP

Both our methods and the recent work, IRLS-PnPDP [32], employ the well-established iteratively reweighted least squares (IRLS) strategy to address outlier problems in IPs. Our methods leverage this strategy to mitigate outliers within the Huber loss framework, which differentially penalizes small and large residuals to limit the influence of outliers while preserving all measurement information. IRLS-PnPDP uses the strategy to solve an  $\ell_q$ -norm minimization problem derived from a generalized Gaussian scale mixture model. While both approaches achieve robustness through iterative reweighting, the Huber loss offers a smooth transition between quadratic and linear penalties controlled by a single threshold parameter, whereas the  $\ell_q$ -norm with  $q < 1$  encourages sparser solutions at the cost of introducing non-convexity. Additionally, we provide a conjugate gradient method as an alternative to gradient descent, avoiding the need for delicate learning rate tuning via an efficient line search strategy.

### B. More experimental results

In this section, we first present the detailed setup of the hyperparameter set in our proposed Robust-GD and Robust-CG methods for different inverse problems in Section B.1. We then present the performance of our methods compared to other approaches on the FFHQ dataset in Section B.2. We also validate the effect of the Huber loss threshold parameter  $\delta$  and the learning rate  $\eta_x$  in Robust-GD, as well as the use of  $\mathbf{g}^T \mathbf{g}$  versus  $\mathbf{g}^T \mathbf{d}$  for calculating  $\alpha$  in Robust-CG, in Section B.3.

#### B.1. Parameter Setup

We present the detailed setup of the hyperparameters used for Robust-GD and Robust-CG in Table 7. Here,  $N$  denotes the total number of sample steps and  $J$  denotes the total number of iterations.  $\delta$  is the Huber loss threshold parameter,  $\eta_x$  is the learning rate used in Robust-GD, and  $\eta$  is the finite-difference approximation parameter used in Robust-CG.

| Hyperparameter | Super-resolution ( $4\times$ ) |           | Inpainting (random 70%) |           | Gaussian Deblurring |           | Motion Deblurring |           | Nonlinear Deblurring |           |
|----------------|--------------------------------|-----------|-------------------------|-----------|---------------------|-----------|-------------------|-----------|----------------------|-----------|
|                | Robust-GD                      | Robust-CG | Robust-GD               | Robust-CG | Robust-GD           | Robust-CG | Robust-GD         | Robust-CG | Robust-GD            | Robust-CG |
| $N$            | 200                            | 200       | 200                     | 200       | 200                 | 200       | 200               | 200       | 200                  | 200       |
| $J$            | 100                            | 20        | 100                     | 100       | 100                 | 20        | 100               | 20        | 100                  | 50        |
| $\delta$       | 0.020                          | 0.005     | 0.010                   | 0.020     | 0.020               | 0.020     | 0.020             | 0.020     | 0.010                | 0.010     |
| $\eta_x$       | 0.0001                         | /         | 0.0001                  | /         | 0.0001              | /         | 0.00005           | /         | 0.00005              | /         |
| $\eta$         | /                              | 0.0001    | /                       | 0.0001    | /                   | 0.0001    | /                 | 0.0001    | /                    | 0.0001    |

Table 7. Detailed setup of the hyperparameter set in our proposed Robust-GD and Robust-CG methods.

#### B.2. Experimental results on FFHQ

We validate the performance of our proposed Robust-GD and Robust-CG methods on the FFHQ dataset for five tasks, namely super-resolution ( $4\times$ ), inpainting (random 70%), Gaussian deblurring, motion deblurring, and nonlinear deblurring. The experimental settings for all tasks are the same as those in Section 4. The results are presented in Table 8 for linear IPs and Table 9 for the nonlinear deblurring task. The results indicate that our methods perform the best across nearly all metrics for all tasks compared to recent DM-based methods.

#### B.3. Ablation study

We validate the effect of the Huber loss threshold parameter  $\delta$  and the learning rate  $\eta_x$  on the Robust-GD method. Additionally, we compare the use of the  $\mathbf{g}^T \mathbf{g}$  term versus the  $\mathbf{g}^T \mathbf{d}$  term for calculating  $\alpha$  in Robust-CG (refer to Eq. (21)).

##### B.3.1. Huber loss threshold parameter

To evaluate the effect of the Huber loss threshold parameter  $\delta$ , we use the same experimental setting as described in Section 4.5.1. We tested the Robust-GD method on 100 validation images from the CelebA dataset for the Gaussian and motion deblurring tasks, using a contamination factor of  $\rho = 0.10$  and a Gaussian noise level of  $\sigma = 0.05$ . We chose the value of  $\delta$  from the set  $\{0.005, 0.01, 0.02, 0.04\}$ . The results presented in Table 10 indicate that Robust-GD performs similarly

| $\rho$           | Methods                 | Super-resolution (4 $\times$ ) |                          |                          |                         | Inpainting (random 70%)  |                          |                          |                         | Gaussian Deblurring      |                          |                          |                         | Motion Deblurring        |                          |                          |                  |
|------------------|-------------------------|--------------------------------|--------------------------|--------------------------|-------------------------|--------------------------|--------------------------|--------------------------|-------------------------|--------------------------|--------------------------|--------------------------|-------------------------|--------------------------|--------------------------|--------------------------|------------------|
|                  |                         | PSNR $\uparrow$                | SSIM $\uparrow$          | LPIPS $\downarrow$       | FID $\downarrow$        | PSNR $\uparrow$          | SSIM $\uparrow$          | LPIPS $\downarrow$       | FID $\downarrow$        | PSNR $\uparrow$          | SSIM $\uparrow$          | LPIPS $\downarrow$       | FID $\downarrow$        | PSNR $\uparrow$          | SSIM $\uparrow$          | LPIPS $\downarrow$       | FID $\downarrow$ |
| 0.02             | DPS                     | 22.53 $\pm$ 1.79               | 0.612 $\pm$ 0.078        | 0.228 $\pm$ 0.062        | 95.41                   | 25.26 $\pm$ 1.71         | 0.719 $\pm$ 0.060        | 0.182 $\pm$ 0.049        | 86.95                   | 23.76 $\pm$ 1.91         | 0.643 $\pm$ 0.076        | <b>0.183</b> $\pm$ 0.052 | <b>85.60</b>            | 22.00 $\pm$ 1.79         | 0.587 $\pm$ 0.081        | 0.220 $\pm$ 0.058        | 93.82            |
|                  | DiffPIR                 | 19.98 $\pm$ 1.50               | 0.525 $\pm$ 0.043        | 0.509 $\pm$ 0.068        | 263.99                  | 25.03 $\pm$ 1.39         | 0.691 $\pm$ 0.032        | 0.310 $\pm$ 0.074        | 146.31                  | 21.49 $\pm$ 0.97         | 0.443 $\pm$ 0.062        | 0.573 $\pm$ 0.084        | 229.75                  | 19.13 $\pm$ 0.82         | 0.322 $\pm$ 0.062        | 0.642 $\pm$ 0.082        | 284.05           |
|                  | DCPS                    | 20.39 $\pm$ 2.21               | 0.612 $\pm$ 0.084        | 0.348 $\pm$ 0.097        | 173.42                  | <u>29.31</u> $\pm$ 2.03  | <b>0.849</b> $\pm$ 0.039 | 0.145 $\pm$ 0.048        | 81.91                   | 21.45 $\pm$ 2.05         | 0.548 $\pm$ 0.086        | 0.297 $\pm$ 0.080        | 158.54                  | 20.82 $\pm$ 3.68         | 0.596 $\pm$ 0.150        | 0.315 $\pm$ 0.158        | 131.96           |
|                  | RED-diff                | 21.73 $\pm$ 1.52               | 0.666 $\pm$ 0.031        | 0.480 $\pm$ 0.066        | 215.67                  | 23.86 $\pm$ 1.29         | 0.646 $\pm$ 0.027        | 0.392 $\pm$ 0.072        | 160.64                  | 26.50 $\pm$ 2.02         | 0.727 $\pm$ 0.053        | 0.318 $\pm$ 0.071        | 103.89                  | 23.42 $\pm$ 1.75         | 0.546 $\pm$ 0.060        | 0.410 $\pm$ 0.076        | 157.78           |
|                  | DAPS                    | 21.92 $\pm$ 1.69               | 0.689 $\pm$ 0.031        | 0.440 $\pm$ 0.075        | 264.15                  | 24.46 $\pm$ 1.67         | 0.694 $\pm$ 0.036        | 0.308 $\pm$ 0.087        | 203.10                  | 22.83 $\pm$ 2.27         | 0.565 $\pm$ 0.086        | 0.467 $\pm$ 0.080        | 235.16                  | 22.35 $\pm$ 2.47         | 0.585 $\pm$ 0.104        | 0.374 $\pm$ 0.118        | 230.03           |
|                  | <b>Robust-GD</b>        | <b>27.83</b> $\pm$ 1.93        | <b>0.780</b> $\pm$ 0.039 | <b>0.226</b> $\pm$ 0.060 | <b>91.25</b>            | 28.95 $\pm$ 1.77         | 0.808 $\pm$ 0.022        | <b>0.087</b> $\pm$ 0.023 | <b>67.89</b>            | <b>28.63</b> $\pm$ 2.24  | <b>0.812</b> $\pm$ 0.045 | <b>0.200</b> $\pm$ 0.056 | <b>78.54</b>            | <b>28.57</b> $\pm$ 2.21  | <b>0.795</b> $\pm$ 0.046 | <b>0.131</b> $\pm$ 0.051 | <b>68.53</b>     |
| 0.10             | <b>Robust-CG</b>        | <b>28.16</b> $\pm$ 2.21        | <b>0.814</b> $\pm$ 0.045 | <b>0.186</b> $\pm$ 0.050 | <b>75.58</b>            | <b>29.51</b> $\pm$ 2.22  | <b>0.847</b> $\pm$ 0.023 | <b>0.070</b> $\pm$ 0.017 | <b>53.15</b>            | <b>28.04</b> $\pm$ 2.35  | <b>0.804</b> $\pm$ 0.054 | <b>0.232</b> $\pm$ 0.065 | 87.66                   | <b>27.79</b> $\pm$ 2.61  | <b>0.783</b> $\pm$ 0.062 | <b>0.162</b> $\pm$ 0.062 | <b>77.63</b>     |
|                  | DPS                     | 19.89 $\pm$ 1.78               | 0.560 $\pm$ 0.086        | <u>0.262</u> $\pm$ 0.070 | 147.83                  | 21.36 $\pm$ 1.66         | 0.641 $\pm$ 0.087        | 0.226 $\pm$ 0.076        | 152.70                  | 21.07 $\pm$ 1.55         | 0.602 $\pm$ 0.080        | <u>0.214</u> $\pm$ 0.056 | 91.95                   | 19.79 $\pm$ 1.52         | 0.542 $\pm$ 0.085        | 0.250 $\pm$ 0.059        | 100.22           |
|                  | DiffPIR                 | 13.79 $\pm$ 1.43               | 0.244 $\pm$ 0.065        | 0.705 $\pm$ 0.067        | 335.80                  | 19.25 $\pm$ 1.50         | 0.432 $\pm$ 0.076        | 0.599 $\pm$ 0.113        | 191.14                  | 17.30 $\pm$ 0.86         | 0.310 $\pm$ 0.064        | 0.685 $\pm$ 0.070        | 332.72                  | 15.98 $\pm$ 0.73         | 0.221 $\pm$ 0.057        | 0.744 $\pm$ 0.076        | 329.52           |
|                  | DCPS                    | 14.96 $\pm$ 1.31               | 0.364 $\pm$ 0.082        | 0.590 $\pm$ 0.076        | 271.28                  | <u>23.58</u> $\pm$ 1.59  | <u>0.787</u> $\pm$ 0.048 | <u>0.186</u> $\pm$ 0.053 | <u>95.24</u>            | 13.94 $\pm$ 1.51         | 0.246 $\pm$ 0.100        | 0.621 $\pm$ 0.093        | 313.75                  | 11.65 $\pm$ 2.81         | 0.155 $\pm$ 0.157        | 0.920 $\pm$ 0.250        | 332.83           |
|                  | RED-diff                | 15.83 $\pm$ 1.61               | 0.436 $\pm$ 0.055        | 0.659 $\pm$ 0.073        | 281.44                  | 19.36 $\pm$ 1.42         | 0.426 $\pm$ 0.066        | 0.631 $\pm$ 0.107        | 186.58                  | 22.17 $\pm$ 1.57         | 0.600 $\pm$ 0.067        | 0.440 $\pm$ 0.082        | 158.14                  | 17.02 $\pm$ 2.06         | 0.296 $\pm$ 0.088        | 0.828 $\pm$ 0.143        | 335.15           |
|                  | DAPS                    | 15.60 $\pm$ 1.94               | 0.395 $\pm$ 0.075        | 0.650 $\pm$ 0.082        | 319.75                  | 18.20 $\pm$ 1.67         | 0.427 $\pm$ 0.082        | 0.615 $\pm$ 0.115        | 282.18                  | 14.52 $\pm$ 2.17         | 0.287 $\pm$ 0.103        | 0.654 $\pm$ 0.081        | 348.48                  | 13.92 $\pm$ 2.21         | 0.263 $\pm$ 0.116        | 0.766 $\pm$ 0.140        | 375.09           |
| <b>Robust-GD</b> | <b>24.15</b> $\pm$ 1.36 | <b>0.648</b> $\pm$ 0.040       | 0.417 $\pm$ 0.080        | <u>141.06</u>            | 20.27 $\pm$ 1.08        | 0.494 $\pm$ 0.060        | 0.500 $\pm$ 0.088        | 197.86                   | <b>28.37</b> $\pm$ 2.17 | <b>0.804</b> $\pm$ 0.045 | <b>0.209</b> $\pm$ 0.056 | <b>82.02</b>             | <u>26.36</u> $\pm$ 2.11 | <u>0.710</u> $\pm$ 0.045 | <b>0.153</b> $\pm$ 0.050 | <b>70.98</b>             |                  |
| <b>Robust-CG</b> | <b>27.47</b> $\pm$ 2.17 | <b>0.800</b> $\pm$ 0.046       | <b>0.194</b> $\pm$ 0.052 | <b>76.75</b>             | <b>28.24</b> $\pm$ 1.95 | <b>0.799</b> $\pm$ 0.022 | <b>0.087</b> $\pm$ 0.022 | <b>59.16</b>             | <u>27.96</u> $\pm$ 2.32 | <u>0.802</u> $\pm$ 0.054 | 0.234 $\pm$ 0.065        | <u>86.58</u>             | <b>27.51</b> $\pm$ 2.42 | <b>0.767</b> $\pm$ 0.060 | <u>0.168</u> $\pm$ 0.059 | <u>81.94</u>             |                  |

Table 8. (Linear IPs) Super-resolution (4 $\times$ ), inpainting (random 70%), Gaussian deblurring and motion deblurring with additive Gaussian noise ( $\sigma = 0.05$ ) and contamination fraction  $\rho = 0.02$  or  $0.10$ .

| Methods          | $\rho = 0.02$           |                          |                          |                  | $\rho = 0.10$           |                          |                          |                  |
|------------------|-------------------------|--------------------------|--------------------------|------------------|-------------------------|--------------------------|--------------------------|------------------|
|                  | PSNR $\uparrow$         | SSIM $\uparrow$          | LPIPS $\downarrow$       | FID $\downarrow$ | PSNR $\uparrow$         | SSIM $\uparrow$          | LPIPS $\downarrow$       | FID $\downarrow$ |
| DPS DPS          | 22.64 $\pm$ 1.96        | 0.607 $\pm$ 0.089        | 0.227 $\pm$ 0.066        | <u>94.15</u>     | 20.50 $\pm$ 1.58        | 0.575 $\pm$ 0.085        | 0.242 $\pm$ 0.064        | <u>94.60</u>     |
| RED-diff         | 21.93 $\pm$ 1.29        | 0.487 $\pm$ 0.052        | 0.563 $\pm$ 0.101        | 155.26           | 15.98 $\pm$ 1.56        | 0.263 $\pm$ 0.071        | 0.923 $\pm$ 0.136        | 274.57           |
| DAPS             | 20.63 $\pm$ 1.56        | 0.447 $\pm$ 0.077        | 0.635 $\pm$ 0.161        | 300.53           | 15.40 $\pm$ 1.62        | 0.217 $\pm$ 0.068        | 1.044 $\pm$ 0.123        | 418.32           |
| <b>Robust-GD</b> | <b>27.57</b> $\pm$ 1.66 | <b>0.768</b> $\pm$ 0.038 | <b>0.137</b> $\pm$ 0.040 | <b>71.36</b>     | <b>26.36</b> $\pm$ 1.44 | <u>0.710</u> $\pm$ 0.036 | <b>0.153</b> $\pm$ 0.043 | <b>77.31</b>     |
| <b>Robust-CG</b> | <u>25.90</u> $\pm$ 1.86 | <u>0.724</u> $\pm$ 0.056 | <u>0.210</u> $\pm$ 0.062 | 95.05            | <u>25.83</u> $\pm$ 1.80 | <b>0.719</b> $\pm$ 0.052 | <u>0.207</u> $\pm$ 0.051 | 95.47            |

Table 9. Nonlinear deblurring with additive Gaussian noise ( $\sigma = 0.05$ ) and contamination fraction  $\rho = 0.02$  or  $0.10$ .

across these different threshold values, thereby demonstrating the robustness of our methods to the selection of the threshold parameter.

| Threshold $\delta$ | Gaussian Deblurring |                 |                    | Motion Deblurring |                 |                    |
|--------------------|---------------------|-----------------|--------------------|-------------------|-----------------|--------------------|
|                    | PSNR $\uparrow$     | SSIM $\uparrow$ | LPIPS $\downarrow$ | PSNR $\uparrow$   | SSIM $\uparrow$ | LPIPS $\downarrow$ |
| 0.005              | 29.62               | 0.826           | 0.141              | 28.42             | 0.796           | 0.152              |
| 0.010              | 29.80               | 0.827           | 0.136              | 29.33             | 0.806           | 0.128              |
| 0.020              | 29.27               | 0.817           | 0.138              | 29.44             | 0.789           | 0.123              |
| 0.040              | 29.21               | 0.790           | 0.160              | 28.52             | 0.734           | 0.156              |

Table 10. Performance of Robust-CG with different value of the Huber loss threshold  $\delta$  on Gaussian deblurring and motion deblurring with additive Gaussian noise ( $\sigma = 0.05$ ) and contamination fraction 0.10.

### B.3.2. Learning rate in Robust-GD

We validate the effect of the learning rate  $\eta_x$  in the Robust-GD method on five tasks, namely super-resolution (4 $\times$ ), inpainting (random 70%), Gaussian deblurring, motion deblurring and nonlinear deblurring tasks. We use 100 validation images from the CelebA dataset with a contamination factor of  $\rho = 0.10$  and a Gaussian noise level of  $\sigma = 0.05$ . We choose five values of  $\eta_x$  from the set  $\{0.0010, 0.0005, 0.0001, 0.00005, 0.00001\}$ . The results presented in Table 11 indicate that the performance of Robust-GD on five tasks is sensitive to the choice of  $\eta_x$ , thereby motivating the proposition of Robust-CG to avoid the delicate fine-tuning of the learning rate required by Robust-GD.

| Learning Rate $\eta_x$ | Super-resolution (4 $\times$ ) |                 |                    | Inpainting (random 70%) |                 |                    | Gaussian Deblurring |                 |                    | Motion Deblurring |                 |                    | Nonlinear Deblurring |                 |                    |
|------------------------|--------------------------------|-----------------|--------------------|-------------------------|-----------------|--------------------|---------------------|-----------------|--------------------|-------------------|-----------------|--------------------|----------------------|-----------------|--------------------|
|                        | PSNR $\uparrow$                | SSIM $\uparrow$ | LPIPS $\downarrow$ | PSNR $\uparrow$         | SSIM $\uparrow$ | LPIPS $\downarrow$ | PSNR $\uparrow$     | SSIM $\uparrow$ | LPIPS $\downarrow$ | PSNR $\uparrow$   | SSIM $\uparrow$ | LPIPS $\downarrow$ | PSNR $\uparrow$      | SSIM $\uparrow$ | LPIPS $\downarrow$ |
| 0.0010                 | 16.20                          | 0.413           | 0.625              | 19.16                   | 0.438           | 0.585              | 25.32               | 0.697           | 0.215              | 19.75             | 0.357           | 0.646              | 14.44                | 0.173           | 1.160              |
| 0.0005                 | 16.60                          | 0.429           | 0.613              | 19.18                   | 0.445           | 0.583              | 28.49               | 0.756           | 0.182              | 22.11             | 0.431           | 0.541              | 14.36                | 0.174           | 1.181              |
| 0.0001                 | 26.52                          | 0.716           | 0.264              | 23.28                   | 0.575           | 0.374              | 29.27               | 0.817           | 0.138              | 28.53             | 0.734           | 0.154              | 24.52                | 0.582           | 0.269              |
| 0.00005                | 28.29                          | 0.799           | 0.145              | 28.29                   | 0.750           | 0.132              | 29.82               | 0.826           | 0.136              | 29.44             | 0.789           | 0.123              | 27.06                | 0.711           | 0.156              |
| 0.00001                | 15.84                          | 0.546           | 0.405              | 23.62                   | 0.776           | 0.176              | 29.21               | 0.814           | 0.154              | 28.08             | 0.789           | 0.160              | 22.84                | 0.674           | 0.225              |

Table 11. Performance of Robust-GD with different value of learning rate  $\eta_x$  on super-resolution, inpainting, Gaussian deblurring, motion deblurring and nonlinear deblurring with Gaussian noise ( $\sigma = 0.05$ ) and contamination fraction  $\rho = 0.10$ .

### B.3.3. Conjugate gradient term in Robust-CG

We validate the performance of Robust-CG using the  $\mathbf{g}^T \mathbf{g}$  term versus the  $\mathbf{g}^T \mathbf{d}$  term for calculating  $\alpha$  (refer to Eq. (21)) on 100 validation images from the CelebA dataset. The evaluation covers five tasks, namely super-resolution (4 $\times$ ), inpainting

(random 70%), Gaussian deblurring, motion deblurring, and nonlinear deblurring, each with a contamination factor of  $\rho = 0.10$  and a Gaussian noise level of  $\sigma = 0.05$ . The results presented in Table 12 indicate that Robust-CG using  $g^T g$  exhibits more stable and superior performance across all tasks compared to using  $g^T d$ .

| Methods | Super-resolution ( $4\times$ ) |                 |                    | Inpainting (random 70%) |                 |                    | Gaussian Deblurring |                 |                    | Motion Deblurring |                 |                    | Nonlinear Deblurring |                 |                    |
|---------|--------------------------------|-----------------|--------------------|-------------------------|-----------------|--------------------|---------------------|-----------------|--------------------|-------------------|-----------------|--------------------|----------------------|-----------------|--------------------|
|         | PSNR $\uparrow$                | SSIM $\uparrow$ | LPIPS $\downarrow$ | PSNR $\uparrow$         | SSIM $\uparrow$ | LPIPS $\downarrow$ | PSNR $\uparrow$     | SSIM $\uparrow$ | LPIPS $\downarrow$ | PSNR $\uparrow$   | SSIM $\uparrow$ | LPIPS $\downarrow$ | PSNR $\uparrow$      | SSIM $\uparrow$ | LPIPS $\downarrow$ |
| $g^T g$ | 28.96                          | 0.819           | 0.129              | 29.74                   | 0.809           | 0.093              | 29.38               | 0.819           | 0.151              | 28.91             | 0.777           | 0.144              | 26.80                | 0.728           | 0.188              |
| $g^T d$ | 28.07                          | 0.792           | 0.164              | 19.15                   | 0.446           | 0.582              | 29.51               | 0.803           | 0.152              | 24.50             | 0.530           | 0.403              | 23.75                | 0.526           | 0.369              |

Table 12. Performance of Robust-CG using the  $g^T g$  term versus the  $g^T d$  term for calculating  $\alpha$  on **super-resolution** ( $4\times$ ), **inpainting** (random 70%), **Gaussian deblurring**, **motion deblurring** and **nonlinear deblurring** with additive Gaussian noise ( $\sigma = 0.05$ ) and contamination fraction  $\rho = 0.10$ .

### B.4. Ablation of core components

To validate the effectiveness of measurement refinement and the Huber loss, we incorporate these components into two baseline methods, namely DPS and DiffPIR, and denote the resulting variants as Robust-DPS and Robust-DiffPIR, respectively. The results in Table 13 indicate that, with the incorporation of measurement refinement and the Huber loss, both Robust-DPS and Robust-DiffPIR outperform their original counterparts. Additionally, the proposed methods Robust-GD and Robust-CG achieve the best performance across most evaluation metrics, which suggests that their design is more compatible with these components. Furthermore, we visualize the relationship between the distortion metric PSNR and computational cost, including the average inference time over 100 images for the CelebA Gaussian deblurring task, as well as the number of function evaluations and forward operator evaluations for each algorithm. The results in Figure 6 show that Robust-GD and Robust-CG achieve a favorable trade-off between efficiency and reconstruction performance.

| Methods               | CelebA (256 $\times$ 256)  |                 |                    |                  | FFHQ (256 $\times$ 256) |                 |                    |                  | CelebA (256 $\times$ 256) |                 |                    |                  | FFHQ (256 $\times$ 256) |                 |                    |                  |
|-----------------------|----------------------------|-----------------|--------------------|------------------|-------------------------|-----------------|--------------------|------------------|---------------------------|-----------------|--------------------|------------------|-------------------------|-----------------|--------------------|------------------|
|                       | PSNR $\uparrow$            | SSIM $\uparrow$ | LPIPS $\downarrow$ | FID $\downarrow$ | PSNR $\uparrow$         | SSIM $\uparrow$ | LPIPS $\downarrow$ | FID $\downarrow$ | PSNR $\uparrow$           | SSIM $\uparrow$ | LPIPS $\downarrow$ | FID $\downarrow$ | PSNR $\uparrow$         | SSIM $\uparrow$ | LPIPS $\downarrow$ | FID $\downarrow$ |
|                       | <b>Gaussian deblurring</b> |                 |                    |                  |                         |                 |                    |                  | <b>Motion deblurring</b>  |                 |                    |                  |                         |                 |                    |                  |
| DPS                   | 22.06                      | 0.646           | 0.178              | 63.49            | 21.07                   | 0.602           | 0.214              | 91.95            | 20.90                     | 0.596           | 0.208              | <u>68.96</u>     | 19.19                   | 0.542           | 0.250              | 100.22           |
| <b>Robust-DPS</b>     | 27.70                      | 0.765           | <b>0.099</b>       | <b>53.82</b>     | 26.23                   | 0.742           | <b>0.115</b>       | <b>62.79</b>     | 27.58                     | 0.770           | <b>0.108</b>       | <b>56.01</b>     | 26.00                   | 0.744           | <b>0.127</b>       | <b>69.63</b>     |
| DiffPIR               | 18.07                      | 0.355           | 0.622              | 308.93           | 17.30                   | 0.310           | 0.685              | 332.72           | 17.11                     | 0.259           | 0.712              | 340.27           | 15.98                   | 0.221           | 0.744              | 329.52           |
| <b>Robust-DiffPIR</b> | 26.53                      | 0.723           | 0.166              | 78.30            | 24.80                   | 0.675           | 0.227              | 102.18           | 23.46                     | 0.621           | 0.229              | 106.00           | 21.91                   | 0.565           | 0.285              | 132.55           |
| DCPS                  | 15.46                      | 0.302           | 0.575              | 331.91           | 13.94                   | 0.246           | 0.621              | 313.75           | 12.60                     | 0.174           | 0.927              | 338.22           | 11.65                   | 0.155           | 0.920              | 332.83           |
| RED-diff              | 22.96                      | 0.626           | 0.391              | 139.05           | 22.17                   | 0.600           | 0.440              | 158.14           | 17.36                     | 0.311           | 0.836              | 303.61           | 17.02                   | 0.296           | 0.828              | 335.15           |
| DAPS                  | 16.18                      | 0.356           | 0.561              | 297.13           | 14.52                   | 0.287           | 0.654              | 348.48           | 14.99                     | 0.331           | 0.718              | 292.81           | 13.92                   | 0.263           | 0.766              | 375.09           |
| <b>Robust-GD</b>      | <u>29.27</u>               | <u>0.817</u>    | <u>0.138</u>       | 65.59            | <b>28.37</b>            | <b>0.804</b>    | <u>0.209</u>       | <u>82.02</u>     | <b>29.44</b>              | <b>0.789</b>    | <u>0.123</u>       | 84.79            | <u>26.36</u>            | <u>0.710</u>    | <u>0.153</u>       | <u>70.98</u>     |
| <b>Robust-CG</b>      | <b>29.38</b>               | <b>0.819</b>    | 0.151              | <u>62.52</u>     | <u>27.96</u>            | <u>0.802</u>    | 0.234              | 86.58            | <u>28.91</u>              | <u>0.777</u>    | 0.144              | 91.22            | <b>27.51</b>            | <b>0.767</b>    | 0.168              | 81.94            |

Table 13. (**Linear IPs**) **Gaussian deblurring** and **motion deblurring** with additive Gaussian noise ( $\sigma = 0.05$ ) and contamination fraction 0.10 on the CelebA and FFHQ datasets.

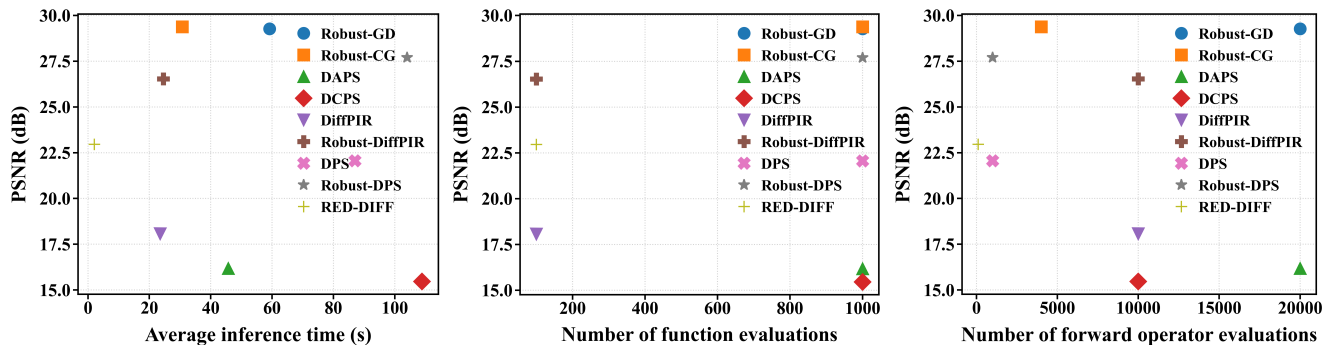

Figure 6. Visualization of the relationship between the distortion metric PSNR and computational cost for the CelebA Gaussian deblurring task. The computational cost is measured in terms of (left) average inference time over 100 images, (middle) number of function evaluations, and (right) number of forward operator evaluations.

### C. Visualization of experimental results

We visualize our experimental results on five tasks, namely super-resolution ( $4\times$ ), inpainting (random 70%), Gaussian deblurring, motion deblurring and nonlinear deblurring tasks across three datasets, namely CelebA, FFHQ and ImageNet. The experiments are conducted with a contamination factor of  $\rho = 0.10$  and a Gaussian noise level of  $\sigma = 0.05$ .

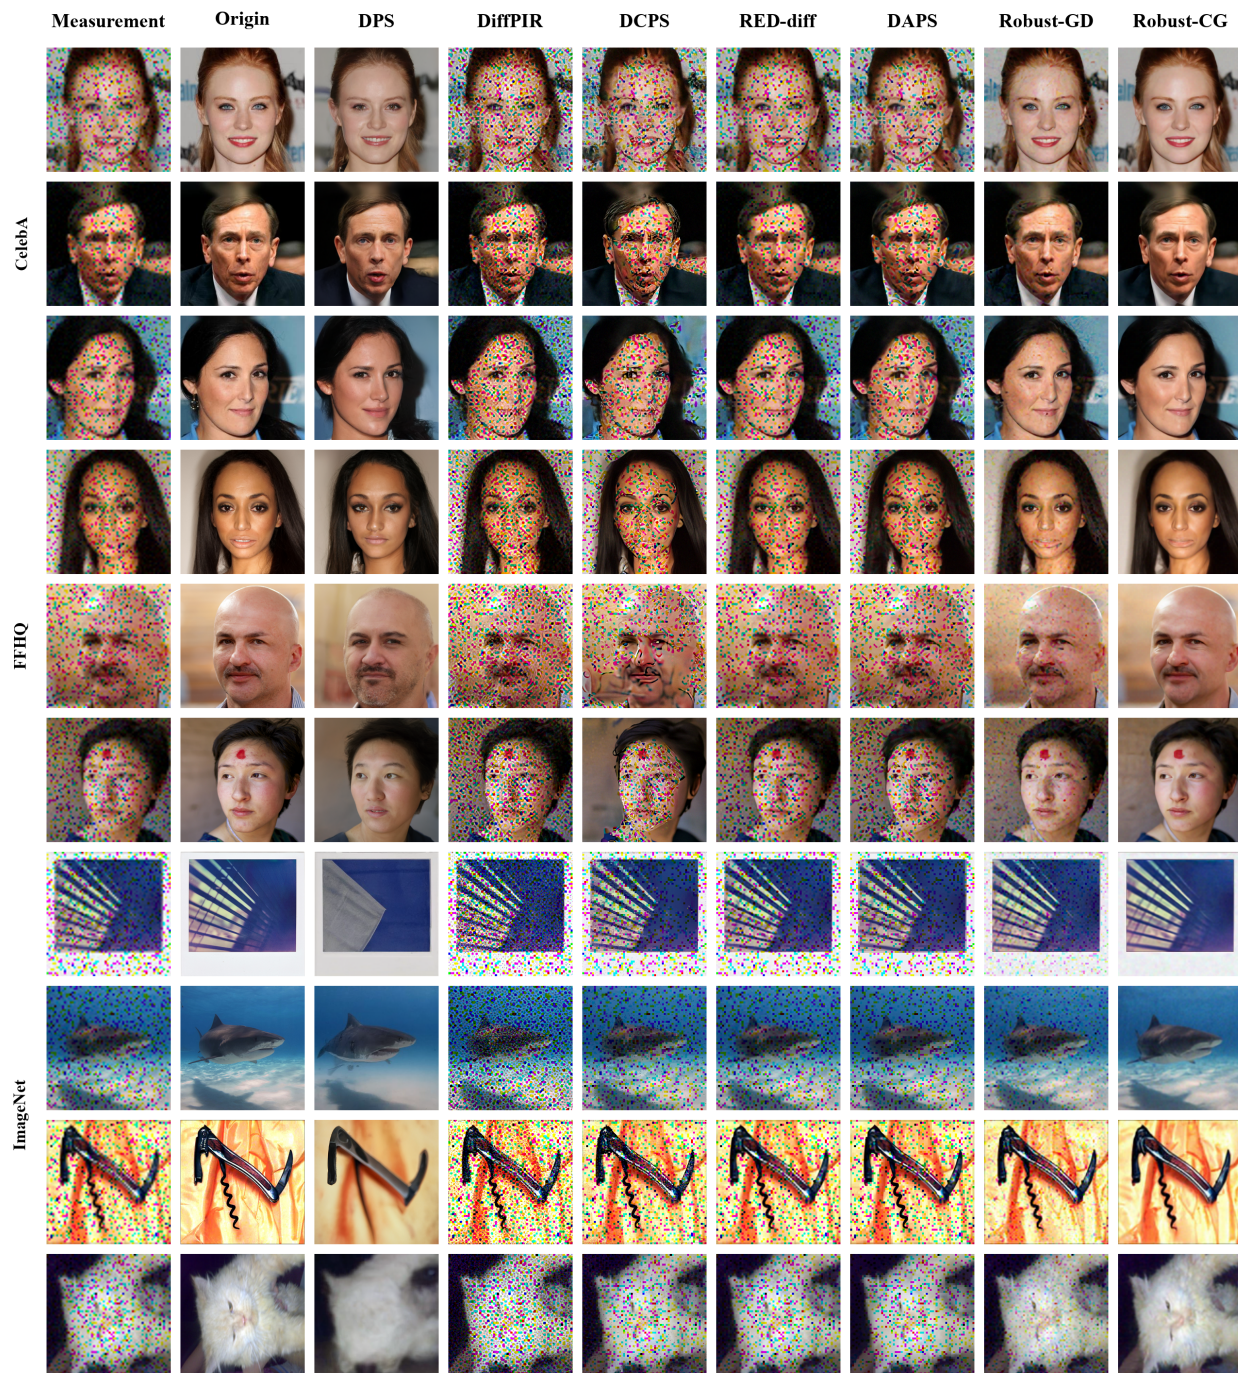

Figure 7. Visualization of the experimental results for the super-resolution ( $4\times$ ) task with a contamination factor of  $\rho = 0.10$  and a Gaussian noise level of  $\sigma = 0.05$ .

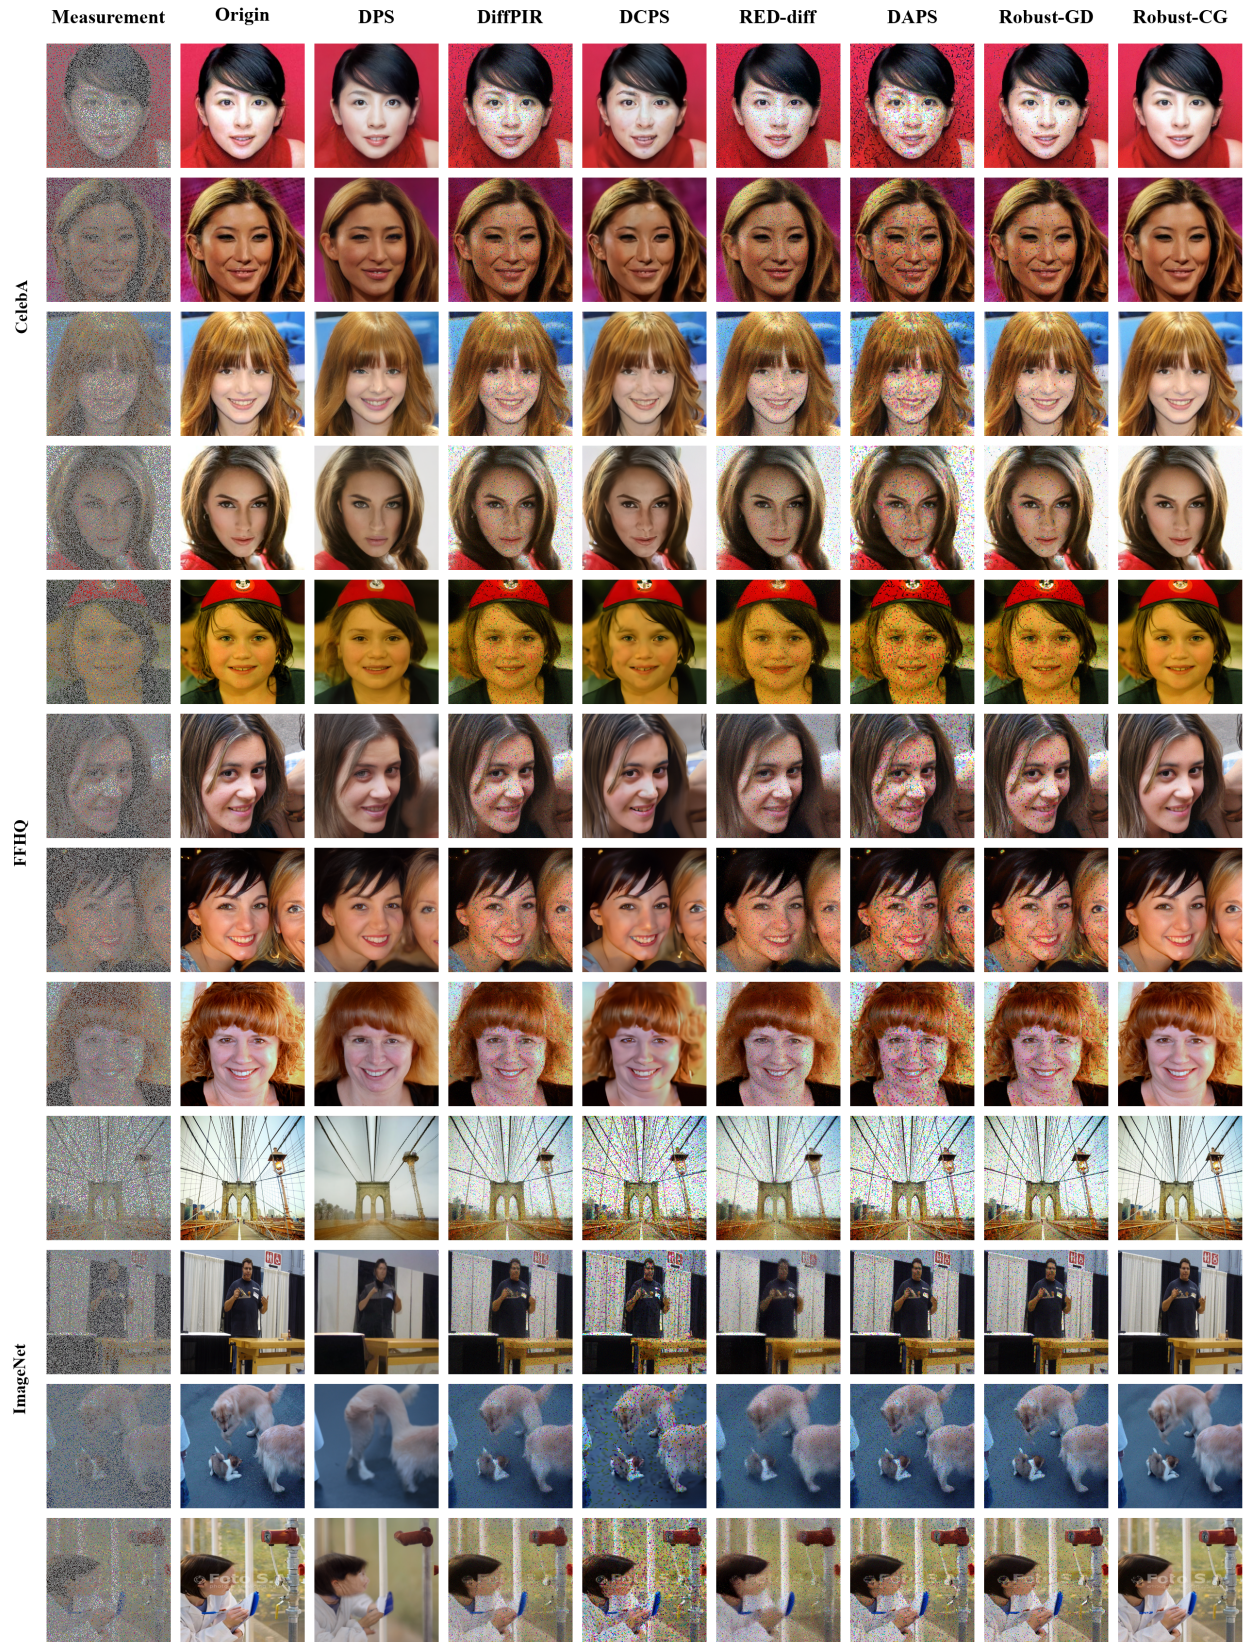

Figure 8. Visualization of the experimental results for the inpainting (random 70%) task with a contamination factor of  $\rho = 0.10$  and a Gaussian noise level of  $\sigma = 0.05$ .

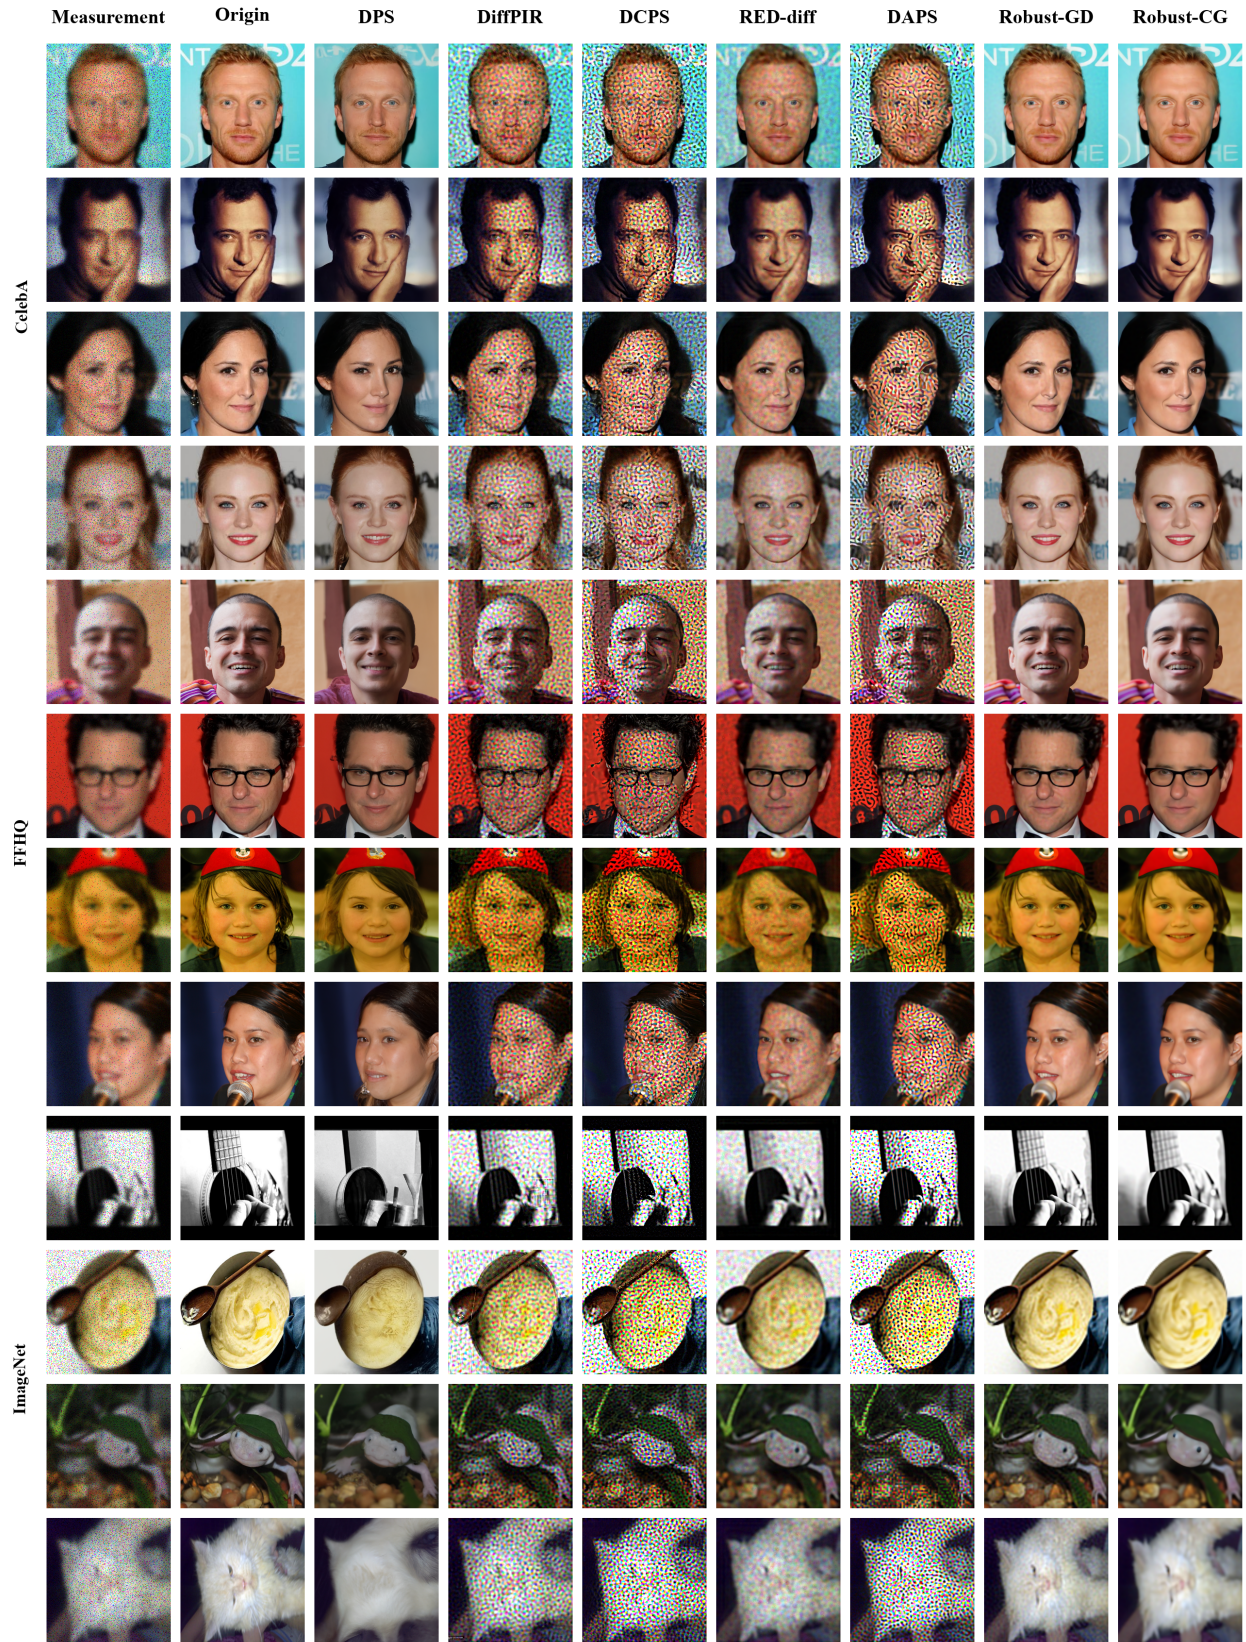

Figure 9. Visualization of the experimental results for the Gaussian deblurring task with a contamination factor of  $\rho = 0.10$  and a Gaussian noise level of  $\sigma = 0.05$ .

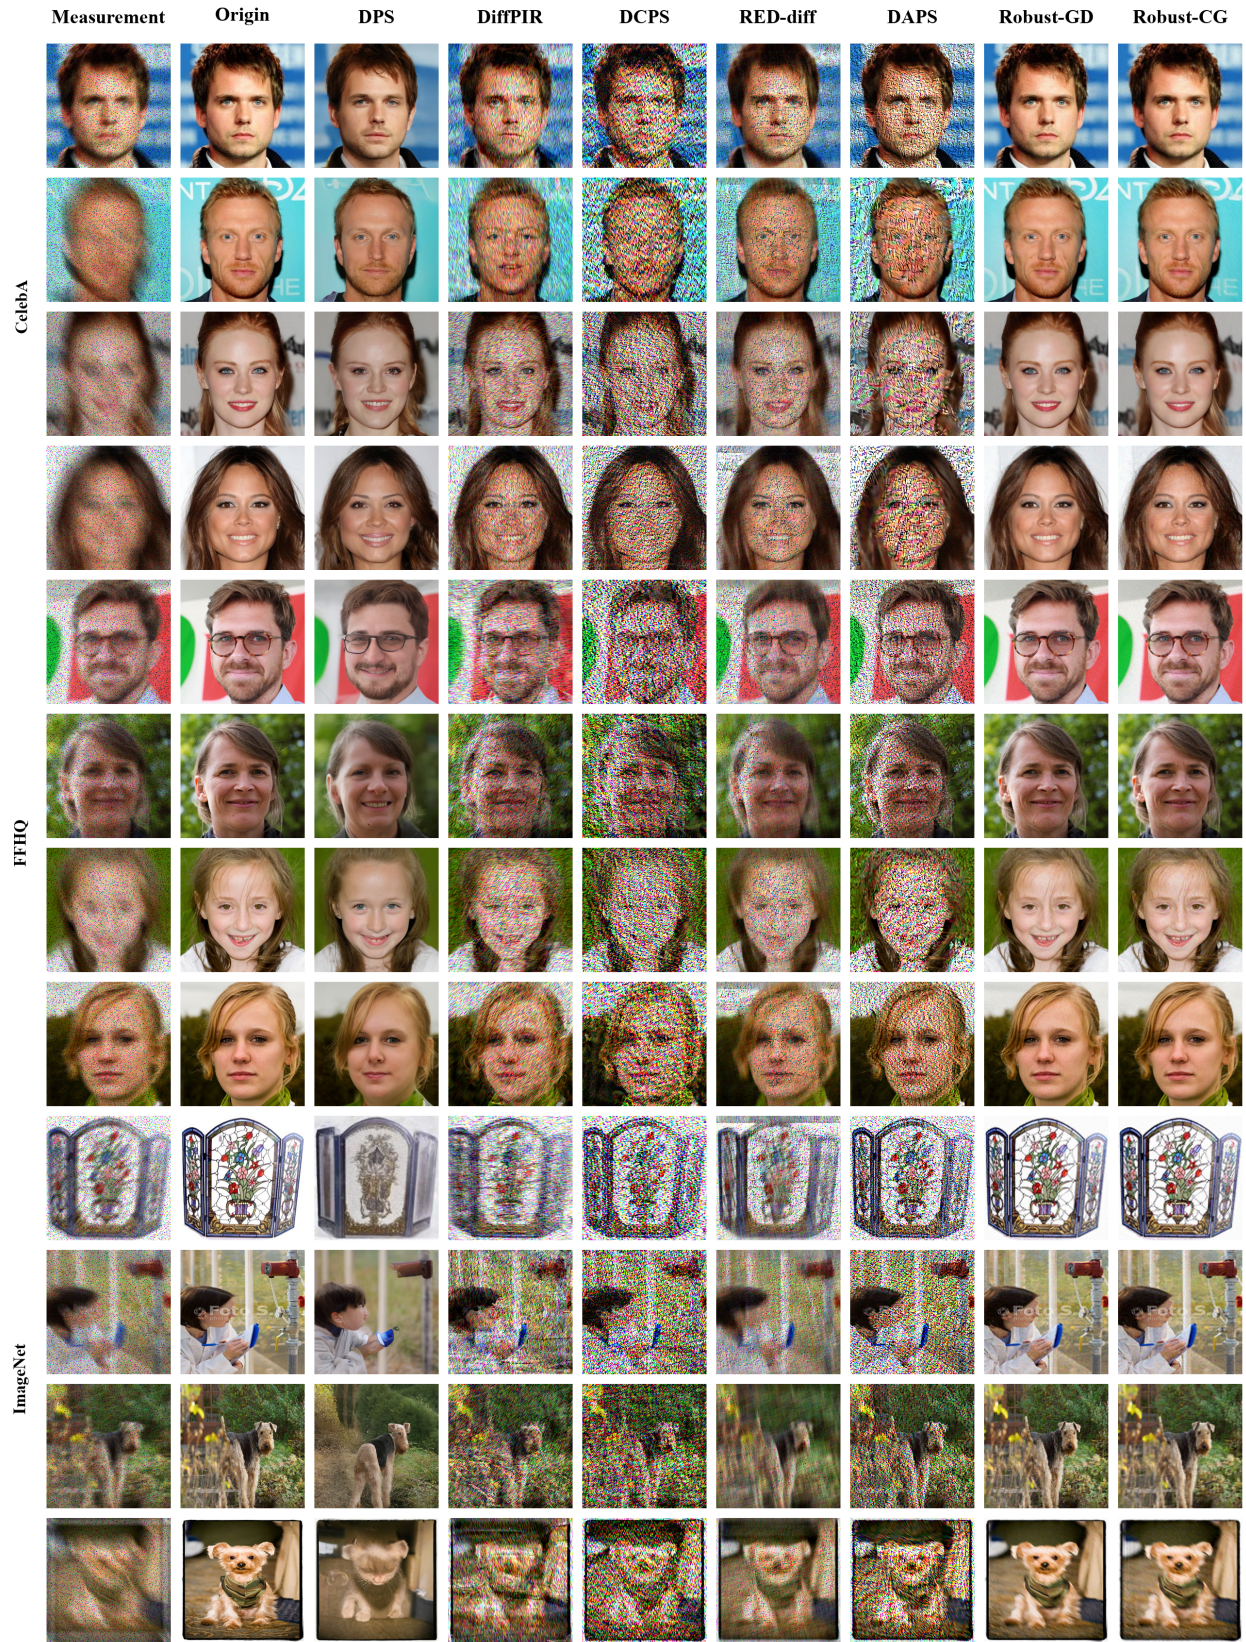

Figure 10. Visualization of the experimental results for the motion deblurring task with a contamination factor of  $\rho = 0.10$  and a Gaussian noise level of  $\sigma = 0.05$ .

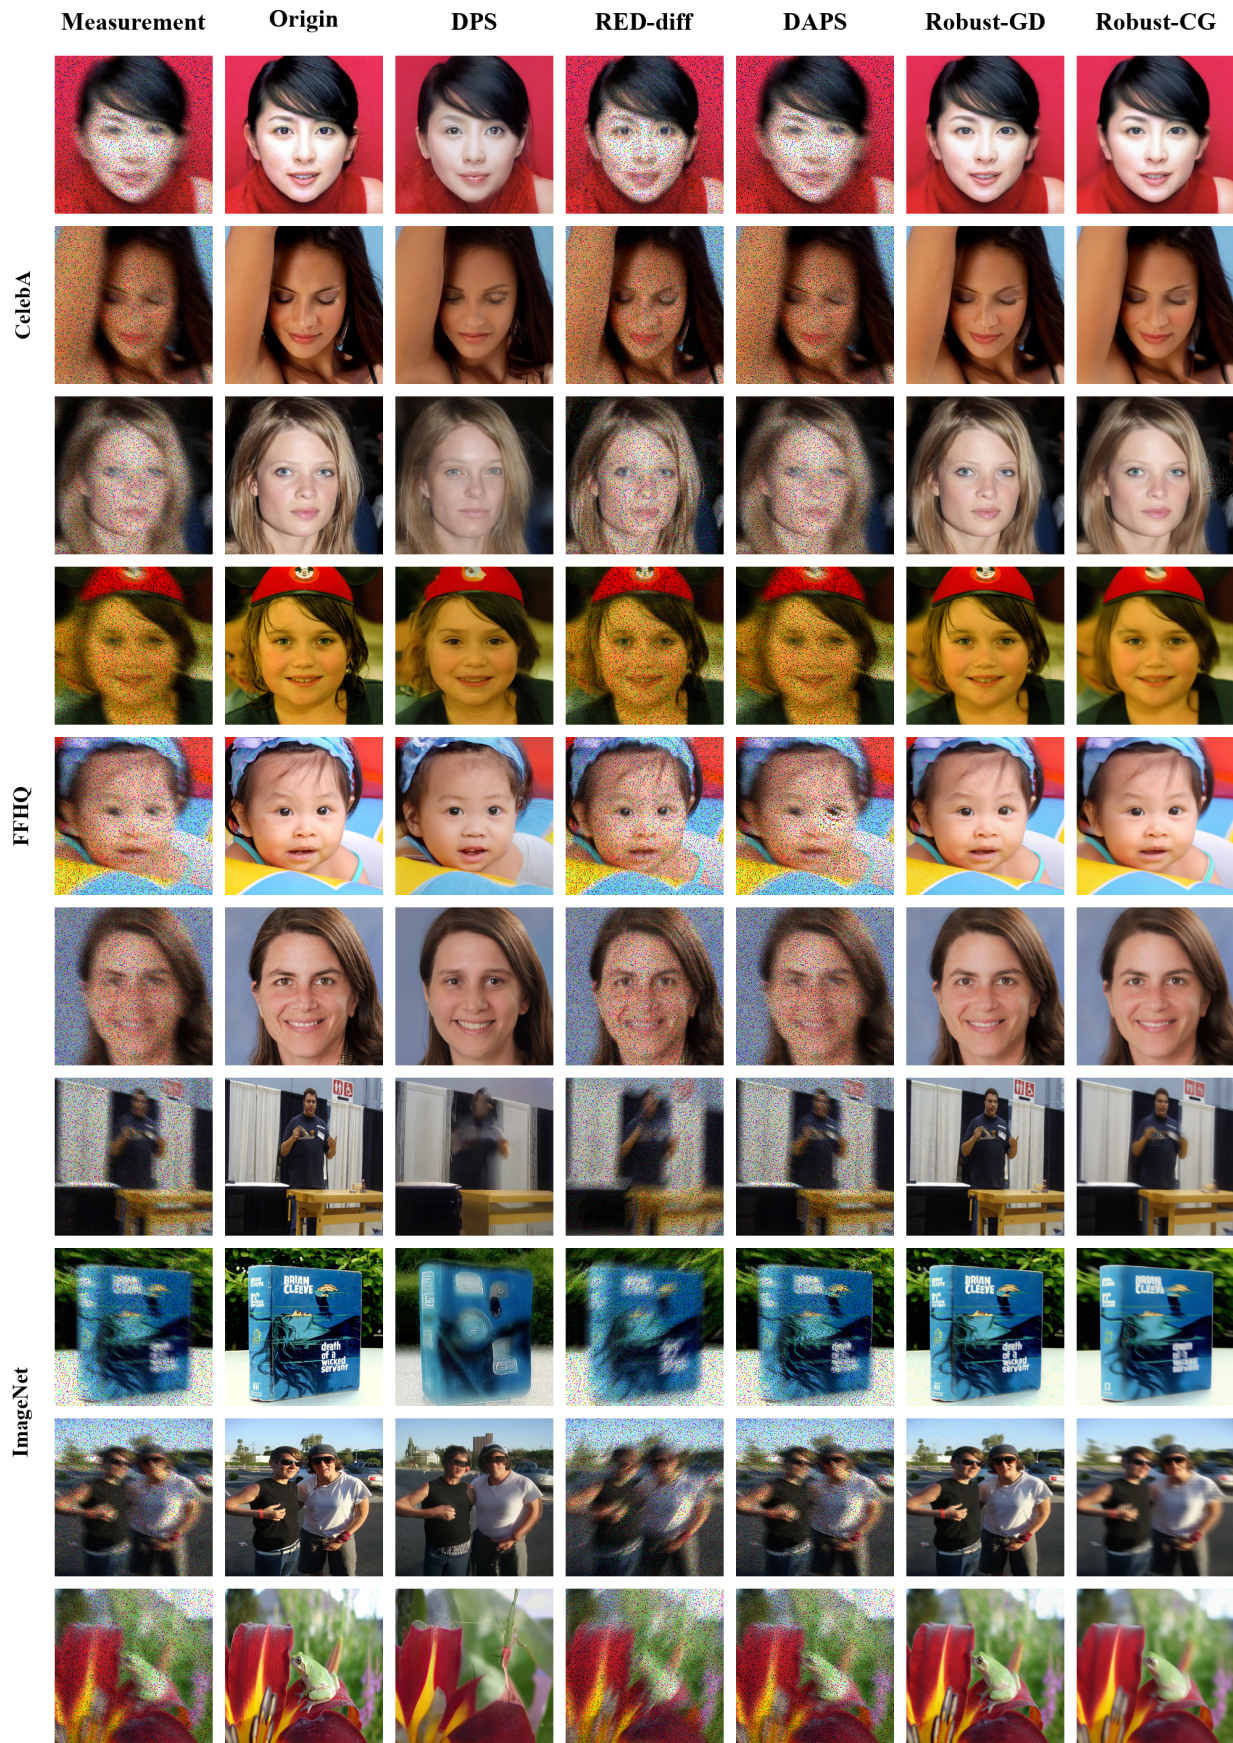

Figure 11. Visualization of the experimental results for the nonlinear deblurring task with a contamination factor of  $\rho = 0.10$  and a Gaussian noise level of  $\sigma = 0.05$ .
